1  
2  
3  
4  
5  
6  
7  
8  
9  
10  
11  
12  
13  
14  
15  
16  
17  
18  
19  
20  
21  
22  
23

**Title: A conserved role of  $\alpha 2\delta$  subunit of calcium channel in nicotine motivated behavior.**

Authors: Chinnu Salim, Enkhzul Batsaikhan, Ann Ke Kan, Hao Chen, and Changhoon Jee\*

Dept. of Pharmacology, Addiction Science and Toxicology, College of medicine, University of Tennessee Health Science Center, 71 S Manassas St., Memphis, TN

\*To whom correspondence should be addressed.

Changhoon Jee, Ph.D  
Dept. of Pharmacology, Addiction Science and Toxicology  
College of Medicine, UTHSC  
71 S. Manassas St., Suite 217  
Memphis, TN, 38103  
Tel) 901-448-6050  
Fax)901-448-1623  
[cjeel@uthsc.edu](mailto:cjeel@uthsc.edu)

Running title: Nicotine-conditioned Cue Preference

Key Words: Nicotine, motivated behavior, CCP, *C. elegans*,  $\alpha 2\delta$ , nAChRs

## 1 **Abstract**

2           Identifying genetic variants associated with nicotine-motivated behavioral traits is an  
3 important strategy to understand the fundamental mechanisms underpinning smoking and tobacco  
4 abuse. For suitable emulation of behavioral phenotype with the full advantage of this invertebrate  
5 model, we newly established a worm model of nicotine seeking by Conditioned Cue Preference  
6 (CCP). We demonstrated that *C. elegans* also exhibited pivotal features of nicotine-motivated  
7 behaviors as in mammals. First, we identified the nicotine-elicited cue preference is mediated by  
8 nicotinic acetylcholine receptors in worms. Additionally, we exhibited dopamine is also required  
9 for the development of CCP. Subsequently, we identified the nAChRs subunits associated with  
10 the facilitation of nicotine preference. Accordingly, we validated human GWAS candidates  
11 associated with nicotine dependence involved in the role of those nAChR subunits. we addressed  
12 the cross-species functional validation to determine the GWAS candidate genes have authentic  
13 roles in nicotine seeking associated with tobacco abuse. The loss of function strain of *CACNA2D3*  
14 orthologue, calcium voltage-gated channel auxiliary subunit alpha2delta 3, was tested for CCP.  
15 We also tested the knock-out (KO) strain of the *CACNA2D2* orthologue, calcium voltage-gated  
16 channel auxiliary subunit alpha2delta 2, which is closely related to *CACNA2D3* in the same family  
17 and shared the human smoking phenotypes. Our orthogonal test suggests the functional  
18 conservation of the  $\alpha 2\delta$  subunit of calcium channel in nicotine motivated behavior.

19

20

21

22

23

## 1 **Introduction**

2 Tobacco abuse has been a major public health concern and smoking is still a leading cause of  
3 preventable death <sup>1</sup>. Tobacco abuse is considerably heritable. <sup>2-6</sup>. Nicotine dependence has been  
4 considered a hallmark in the progress and maintenance of tobacco abuse and human population  
5 genetics has identified statistically significant gene variants relevant to nicotine dependence. <sup>7-9</sup>.  
6 Thus, the identification of genetic mechanisms underlying behavioral traits is an important strategy  
7 for understanding the underpinning mechanism of nicotine dependence. Although genome-wide  
8 association studies (GWAS) have been successfully identified numerous Single Nucleotide  
9 Polymorphisms (SNPs) associated with substance use disorder (SUD) over the past decade <sup>9-14</sup>,  
10 most of the candidate genetic variants have not been independently validated or improved our  
11 understanding of nicotine dependence.

12 We, therefore, exploit the rapid genetic workflow of *C. elegans*, which has a simple nervous  
13 system but completely defined connectome<sup>15-17</sup>, as a tool for accelerating functional validation of  
14 GWAS candidates associated with smoking/nicotine self-administration behavior. *C. elegans*  
15 responds to abused substances in a way that mimics substance-dependent behaviors observed in  
16 mammals <sup>18-27</sup>. Hence, worms have been a powerful model for SUD and nicotine dependence. *C.*  
17 *elegans* exhibit nicotine withdrawal-dependent behavior and state-dependent development of  
18 chemical preference, analogous to mammalian studies <sup>22,26,27</sup>. Accordingly, we established nicotine  
19 Conditioned Cue Preference (CCP) to measure the nicotine preference and seeking in *C. elegans*.  
20 Here, we are demonstrating nicotine and withdrawal elicits CCP in *C. elegans*. The CCP assay  
21 stably elicits acquisition, progress, and extinction of nicotine-paired cue preference. The CCP  
22 assay also reveals CPP properties in mammals that are mediated by nicotinic acetylcholine  
23 receptors (nAChRs) and dopamine.

1        Subsequently, we tested nAChRs mutant animals in CCP to define nAChR subunits that  
2 specifically act on nicotine seeking. We then tested GWAS candidates of human smoking and  
3 nicotine dependence associated with the role of those nAChR subunits. Here, we suggest  $\alpha\delta$   
4 subunit of Voltage-Gated Calcium Channel (VGCC) is required for the nicotine preference  
5 affecting the progression of nicotine dependence.

6

## 7 **Results**

8 ***Establishment of CCP (Conditioned-Cue Preference).*** Psychostimulants including nicotine elicit  
9 a CPP in rats and mice<sup>28-30</sup>. We adapted the mammalian Conditioned Place Preference (CPP), a  
10 form of associative learning used to study the rewarding and aversive effects of drugs, to develop  
11 nicotine CCP and determine the nicotine preference and seeking in *C. elegans*. We have found that  
12 hexane, an alkane volatile odorant, is a neutral stimulus to *C. elegans* and is suitable as a  
13 conditioned stimulus (CS). Hexane was tested in numerous ranges of concentrations (Fig. 1a). *C.*  
14 *elegans* showed no preference at any tested concentrations (Hexane; 98.5% as non-diluted,  $10^{-1}$ ,  
15 and  $10^{-2}$  diluted). Subsequently, classical conditioning was performed using nicotine as an  
16 Unconditioned Stimulus (US) (Fig. 1b). The nicotine concentration and withdrawal time from  
17 nicotine were determined based on the behavioral and physiological response to various  
18 concentrations shown in previous studies<sup>23</sup>.

19        Worms first respond to the psychostimulant, nicotine by increasing motility at about 1.5  
20  $\mu\text{M}$  concentration<sup>(26)</sup>, although, high concentrations (100  $\mu\text{M}$ ) of nicotine will induce locomotor  
21 paralysis in *C. elegans*; presumably due to acutely activating acetylcholine-sensitive ion channels  
22 on the worm's motor neurons and muscles<sup>(23)</sup>. Furthermore, worms show nicotine-induced  
23 motivated behavior over a range of concentrations<sup>(31)</sup>. In addition, nicotine withdrawal causes

1 locomotion stimulation in worms as a withdrawal symptom. The 1.5  $\mu$ M concentration was  
2 sufficient to induce this nicotine-dependent stimulation of locomotion, thus we mainly used it for  
3 our CCP assays. Wild-type animals successfully develop acquisition of nicotine Conditioned Cue  
4 Preference (CCP) after a prolonged time of association in time-dependent manner (Fig.1c). In a  
5 similar manner, other concentrations of nicotine (which were higher but not paralyzing the worms)  
6 also successfully elicited the preference. Seeking Index (SI) is obtained as represented in Fig. 1b.  
7 A high SI indicates that the nicotine-paired cue acts as a strong attractant, which corresponds to  
8 the development of preference by the conditioning with reinforcing drug. Prolonged conditioning  
9 of CS (hexane) and US (nicotine) leads to the development of nicotine-paired cue preference,  
10 although hexane is a neutral olfactory stimulus to naive animals. The CCP was validated by  
11 pretreatment of US only, CS only, or Conditioned (CS+US), respectively. CCP was not developed  
12 by US only or CS only, whereas conditioning occurred and facilitated CCP when CS was paired  
13 with the US (Fig.1d).

14 We also demonstrate that CCP induced by nicotine is mediated by dopamine signaling.  
15 The development of CCP was impaired in the KO mutant animals of *cat-2*, tyrosine hydroxylase  
16 in *C. elegans*, which was dopamine deficient (Fig.2). It suggests that the CCP of worms has an  
17 evident face value, the recapitulation of the pivotal features of nicotine-dependent behaviors in  
18 mammals, in which nicotine-caused increased dopamine mediates nicotine-induced motivated  
19 behavior<sup>32, 33</sup>. Additionally, wild-type animals can also represent the extinction of CCP, greatly  
20 reduced paired rewarding. Expression of nicotine-induced CCP was abolished in subsequent  
21 chemotaxis assays after the presentation of CS (hexane) alone in the absence of US (nicotine)  
22 during the withdrawal period (Fig.3a). Therefore, it feasibly suggests that CCP can be used to  
23 investigate the genes and pathways associated with reinstatement. Accordingly, to further

1 investigate the underlying mechanism involved in the regulation of CCP in the neural circuits, we  
2 questioned neural circuits that mediate positive chemotaxis to CS that were previously neutral but  
3 acted as attractants after conditioning. Chemotaxis behaviors are regulated primarily by the  
4 chemosensory neurons and modulated by integration of signaling with interneurons<sup>34,35</sup>. *C.*  
5 *elegans* have 32 presumed chemosensory neurons that detect a variety of olfactory and gustatory  
6 cues<sup>36-39</sup>. In worms, AWC and AWA, ciliated chemosensory neurons, mediate attraction to the  
7 volatile odorants<sup>40</sup>. We exploited AWC-ablated animals to test in CCP. Killing a pair of AWC  
8 neurons via expression of reconstituted Caspase<sup>41,42</sup> resulted in impaired CS (hexane) preference  
9 after conditioning with US (nicotine) (Fig. 3b), indicating that the primary sensory neurons are  
10 AWC head neurons for attraction to hexane after conditioning.

11 In the laboratory, *C. elegans* is reared in agar plates seeded with OP50 bacteria as a food  
12 source. Since cultivation without food has been used for odor/starvation conditioning paradigm  
13 for Conditioned Place Aversion (CPA), in order to dispel any controversy about the cultivation  
14 environment in the CCP assay, the nicotine conditioning and withdrawal process in CCP assay  
15 was conducted in the presence of OP50 bacteria on nicotine plates (Fig. 1, 2 and 3). However, we  
16 expanded the usage of the CCP to confirm the reinforcing effects of nicotine acting in worms were  
17 irrelevant to food. A development of CCP was also provoked by the repeated intermittent pairing  
18 of hexane with nicotine (Fig.4). CCP was successfully facilitated by the short period (1min) of  
19 multiple sessions of conditioning of US (nicotine) and CS (hexane) without *E. coli* (food) and  
20 following withdrawal, indicating CCP was specifically elicited by nicotine alone. It demonstrated  
21 the reinforcing effect of nicotine in *C. elegans*. Together with the result in Fig. 1d, in which CCP  
22 was not established when CS (hexane) was presented alone with the food, it demonstrated that  
23 nicotine is the primary reinforcer in the progress of CCP in *C. elegans*.

1 **CCP via nAChRs.** The nAChRs function as pentameric ligand-gated ion channels. Conformational  
2 transitions after binding to nicotine, accompanied by various regulatory mechanisms enable  
3 nAChRs to respond dynamically to genetic and environmental factors. Elucidating subunits that  
4 specifically play a role in preference and seeking behavior elicited by nicotine will provide insight  
5 in the conservative role of nAChRs in mammals. It has been reported that two nAChR subunits,  
6 ACR-15 and ACR-16, are required for nicotine-withdrawal induced stimulation of locomotion<sup>23</sup>.  
7 Nicotine also elicits associative learning with the rewarding effects in worm and ACR-5 and ACR-  
8 15 have been reported involved in this<sup>31</sup>. We tested nAChR subunit KO mutant animals in CCP  
9 assay. The 29 nAChR homologs are reported in *C. elegans* genome whereas 17 in mammals<sup>23,43</sup>.  
10 These nAChRs classified into five groups, which are ACR-16 group, UNC-29 group, UNC-38  
11 group, ACR-8 group, and DEG-3 group<sup>43</sup>. We screened 12 nAChR mutants by CCP assay,  
12 focusing on ACR-16 group, which closely resembles the mammalian  $\alpha 7$ -nAChR subunit, a  
13 predominant subtype in the brain<sup>44,45</sup>. Here, we represent consistent results with previous findings  
14 and also newly identified additional nAChR subunits associated with nicotine-induced motivated  
15 behaviors (Fig. 5). In a single session of chronic CCP analysis, we identified delayed development  
16 of CCP in KO mutants of *acr-5*, and impaired in *acr-15*, *acr-16*, which is compatible with the  
17 previous reports in nicotine dependent-locomotion of worms (Fig. 5). Furthermore, we also  
18 identified the impaired development of CCP in KO mutants of *acr-9*, *acr-11*, *acr-21* (Fig. 5). The  
19 expression enrichment profile, provided by a single-cell gene expression profile of every neuron  
20 type in the *C. elegans* (CeNGEN)<sup>46</sup>, shows that *acr-9* is expressed in AVA, a crucial interneuron  
21 validated for the development of nicotine-dependent locomotion, in which *acr-15* and *acr-16* are  
22 expressed<sup>23</sup>. Recently, the AVA interneurons have been shown to participate in the integration of  
23 sensory-motor input and decision making<sup>47</sup>. Interestingly, *acr-21*, the nAChR  $\alpha 9$  (CHRNA9)

1 orthologue, is enriched in the RMG<sup>46</sup>, the gap junctional hub interneurons that electrically connect  
2 to many sensory, motor, and interneurons and is known to modulate pheromone attraction and  
3 social behavior<sup>48</sup>. RMG neurons form a close connection with AVA and ADA neurons, and *acr-*  
4 *11*, which we newly identified to play a role in nicotine CCP, is reported to be enriched in ADA.  
5 We also identified the *unc-63* and *unc-38* mutants were defective in the development of CCP. This  
6 result is consistent with previous investigation in nicotine dependent stimulation of locomotion,  
7 however, a further comprehensive analysis will be required as both mutant animals, *unc-63* and  
8 *unc-38*, are not severely uncoordinated as described<sup>23,49,50</sup>. Nonetheless, our results demonstrate  
9 that the nicotine-elicited conditioned cue preference is mediated by nAChRs.

10 ***Orthogonal test for nicotine preference.*** Cross-species functional validation of GWAS candidates  
11 using *C. elegans* has been used successfully to demonstrate the functional relevance of candidates  
12 in substance dependent behaviors<sup>(51)</sup>. We asked whether nicotine CCP in worms could be a viable  
13 and useful tool to accelerate the assessment of biologically significant pathways associated with  
14 nicotine dependence through rapid functional characterization of GWAS candidates. Nicotine has  
15 been reported to evoke a calcium response from worms to mammals<sup>23,52-54</sup>. The nAChRs mediate  
16 the increased intracellular calcium via VGCC-dependent and VGCC-independent manners that  
17 contribute to neural plasticity. Functional nAChRs are homopentameric or heteropentameric  
18 channels composed of 5 subunits by a combination of the  $\alpha$ ( $\alpha 2$ - $\alpha 10$ ) and  $\beta$ ( $\beta 2$ - $\beta 4$ ) subunits<sup>55-58</sup>.  
19 The Genome-wide meta-analysis on nicotine dependence has reported the protective role of  
20 *CACNA2D3* in nicotine dependence for African Americans<sup>59</sup>. The *CACNA2D3* is also reported in  
21 the association of success in abstaining from smoking<sup>60</sup>. *CACNA2D3* is responsible for encoding  
22 the  $\alpha 2\delta$ , auxiliary subunits of Voltage-Gated Calcium Channel (VGCC), which influences the  
23 biophysical properties of the calcium channels<sup>61</sup>. The worm orthologue of *CACNA2D3* modulates



1 voltage dependence, the activation kinetics, and the conductance of calcium current of VGCC like  
2 mammalian  $\alpha 2\delta$  (<sup>62</sup>). Other members of the  $\alpha 2\delta$  family, *CACNA2D2* is also associated with  
3 nicotine dependence, smoking initiation, and cigarettes consumption <sup>63</sup>. The loss of function  
4 alleles of *unc-36*, *CACNA2D3* orthologue was tested in CCP for the functional validation in the  
5 development of nicotine preference. We have tested multiple mutant alleles of *unc-36*. The *unc-*  
6 *36 (e251)* and *unc-36 (ad698)* are both loss of function alleles by the introduction of the premature  
7 stop codon and showed delayed or impaired progress of nicotine-conditioned cue preference in a  
8 single session of chronic CCP unlike WT animals (Fig. 6a, 6b, and 6c). We also tested mutant  
9 animals of *tag-180*, *CACNA2D2* orthologue, which is closely related to *CACNA2D3* in the same  
10 family and shared the human smoking phenotypes. The *tag-180 (ok779)*, deletion mutant (KO),  
11 showed impaired development of nicotine preference (Fig. 6d). We also tested animals in repeated  
12 session of conditioning and intermittent withdrawals. The orthogonal test exhibited a reduced  
13 development of CCP in *unc-36 (e251)* and *tag-180(ok779)* (Fig. 6e). Taken together, our data  
14 demonstrate that  $\alpha 2\delta$  subunit of VGCC is required for the nicotine preference contributing to the  
15 development of nicotine dependence.

## 16 **Discussion**

17 Human genetic association studies have been successful in revealing genetic variants  
18 associated with smoking-related phenotypes. When analyzing the NHGRI/EBI GWAS catalog  
19 (release:2021-01-14), it contained 1,504 SNPs associated with smoking/nicotine that reached  
20 genome-wide significance. Most of these variants (93%) are yet to be replicated by an independent  
21 study. Although GWAS studies associated with tobacco smoking have revealed numerous genetic  
22 factors, the estimated heritability has been limited to explaining underlying mechanisms. Thus,  
23 various attempts have been suggested to accelerate functional validation and comprehensive

1 analysis <sup>64</sup>. In a comparative proteomics study, 83% of the worm proteome exhibits homology  
2 with human genes and recent meta-analysis with orthology-prediction methods showed that  
3 approximately 52.6% of the human protein-coding genome has noticeable orthologues in worms,  
4 illustrating that the nematode provides a suitable model organism for functional validation of  
5 human genes. <sup>65,66</sup>.

6 Cross-species functional validation has long been used in worms including SUD related  
7 phenotypes. For example, the introduction of a human TRPC (transient receptor potential  
8 canonical) channel can rescue the defective nicotine dependent simulated locomotion phenotype  
9 of worm TRPC channel KO strain <sup>23</sup>. A mammalian transient receptor potential channel vanilloid  
10 (TRPV) can substitute worm orthologue and directs behavioral responses <sup>67</sup>. The transgenic worms  
11 containing the human SLC18A2 gene provided model to investigate the brain dopamine and  
12 serotonin vesicular transport disease <sup>68</sup>. Recently, interspecies chimerism with a mammalian gene  
13 in the worm platform identified orphan anti-opioid system <sup>69</sup>. The transgenic worm to express the  
14 mammalian  $\mu$  (mu) opioid receptor (MOR), which is not normally found in the worm genome,  
15 responds to opioids such as morphine and fentanyl. Successively, this transgenic worm contributed  
16 to finding the orphan GPCR of which mammalian orthologue shows functional conservation  
17 related to the anti-opioid pathway. Therefore, we exploited worms to define vulnerability  
18 phenotypes by proper modeling of behavioral phenotypes and to test the functional evaluation of  
19 human GWAS candidates associated with nicotine dependence and smoking. The CCP in worms  
20 is specifically induced by nicotine and mediated by dopamine. We identified the nicotine-elicited  
21 cue preference is mediated by nicotinic acetylcholine receptors in worms. Taken together, we  
22 demonstrated that worms exhibited the key features of nicotine-dependent behaviors in mammals.

1           The GWAS reveals numerous risk factors associated with diseases. Despite the successes  
2 of GWAS, most of the candidate genetic variants have not been independently validated or  
3 provided novel insight into novel treatments. Experimental approaches for functional validation  
4 will be required to determine whether candidate genes have an actual role in the disease. A  
5 previously identified GWAS variant of *CACNA2D3*, in which the SNP is in the intron region, was  
6 not prioritized for further validation, but it was reported that this variant was associated with  
7 reduced expression levels in three human brain tissues and was associated with nicotine  
8 dependence<sup>59</sup>. We validated its function by testing the loss of function or KO strains of orthologue  
9 that allow for further pathway evaluation afterwards. A *CACNA2D3* encodes  $\alpha 2\delta$ , auxiliary  
10 subunits of VGCC, that influences the biophysical properties of the calcium channels. VGCCs are  
11 pivotal in excitable cells with permeability to mainly calcium ions. Although it has been suggested  
12 that permeation of calcium ions into cells through VGCC will play a pivotal role in the induction  
13 of plasticity of nicotine through nAChRs<sup>52,70,71</sup>, close interaction between nAChRs and VGCC for  
14 the subsequent event to mediate nicotine response is depending on the cell types, in which specific  
15 subtypes of nAChRs are expressed<sup>57,58</sup>. Mostly, non- $\alpha 7$ -nAChRs mainly interact with the VGCC  
16 to mediate the signaling caused by nicotine.

17            $\alpha 2\delta$  proteins are encoded by 4 genes (*CACNA2D1*, *CACNA2D2*, *CACNA2D3*, *CACNA2D4*)  
18 and expressed throughout the central nervous system to co-assemble with most of the  $\alpha 1$  subunit  
19 forming functional calcium channel<sup>72</sup>.  $\alpha 2\delta$  proteins also interact with other proteins such as  $\alpha$ -  
20 neurexins, LRP1 (low-density lipoprotein receptor-related protein 1), NMDA receptor (N-methyl-  
21 d-aspartate), and BK channels (large-conductance calcium-activated potassium channels)<sup>73-76</sup>.  
22 The part of these might be related to recent implications of  $\alpha 2\delta$  proteins in the progress of SUD.  
23 Like *CACNA2D2* and *CACNA2D3* have been reported as GWAS candidates associated with

1 nicotine dependence <sup>59,63</sup>, *CACNA2D1* has been involved in the increased presynaptic NMDAR  
2 activity associated with hyperalgesia following chronic morphine <sup>77</sup>. An aberrant interaction  
3 between thrombospondin (TSP) and *CACNA2D1* has been proposed as a possible mechanism of  
4 synaptic remodeling in the hippocampus during chronic ethanol consumption <sup>78</sup>. An interaction  
5 between  $\alpha$ -neurexins and  $\alpha 2\delta$  proteins is evolutionarily well conserved endorsed by an interaction  
6 between NRX-1 and UNC-36 in *C. elegans* <sup>73</sup>. The *C. elegans* genome includes 2 genes predicted  
7 to encode  $\alpha 2\delta$  family proteins, *unc-36* and *tag-180*, predicted as *CACNA2D3/ CACNA2D1* like  
8 orthologue and *CACNA2D2* like orthologue, respectively <sup>66</sup>. Like mammalian  $\alpha 2\delta$  proteins, the  
9 function of UNC-36 in the modulation of the voltage dependence, the activation kinetics, and the  
10 conductance of calcium currents was electrophysiologically validated in the neuromuscular  
11 junction, whereas TAG-180 has no effects <sup>62</sup>. UNC-36 has been also demonstrated as a regulator  
12 of synaptogenesis together with UNC-2, Ca<sub>v</sub>2-like  $\alpha 1$  subunit of VGCC, in the neuromuscular  
13 junction <sup>79</sup>. Interestingly, the *tag-180* has not shown a functional association related to calcium  
14 channel activity so far. However, it is of interest that the behavioral phenotype of *tag-180* in  
15 nicotine motivated behavior has been defined, here. Perhaps it reflects the non-canonical  
16 interactions and role of  $\alpha 2\delta$  proteins, such as the accumulation of *CACNA2D2* in lipid rafts  
17 independently from the interaction with calcium channels <sup>80</sup>.

18 Here, we have established a novel CPP paradigm assay for nicotine seeking in worms  
19 which could accelerate the functional validation of genes associated with the progress of nicotine  
20 dependence. We determined the nicotine seeking by CCP and the functional validation of the  
21 orthogonal test showed orthologues of *CACNA2D2*, *CACNA2D3* have a role in nicotine-motivated  
22 behavior in *C. elegans*. Thus, follow-up studies of the  $\alpha 2\delta$  protein should be performed to  
23 investigate a comprehensive functional characterization of the mechanisms of nicotine seeking and

1 taking. We are pursuing the identification of nAChR subunits that specifically act on nicotine  
2 seeking and defining a subset of neurons in which this subunit acts.

3

#### 4 **Materials and Methods**

5 All strains were cultivated on nematode growth media (NGM) plates with *Escherichia coli* strain  
6 OP50 at 20°C as described <sup>81</sup> and the hermaphrodite worm was used for behavioral analysis. The  
7 Bristol N2 strain was used as wild-type (WT) animals. The strains below were obtained from  
8 Caenorhabditis Genetics Center (CGC, Minneapolis, MN, USA), which is supported by the  
9 National Institutes of Health Office of Research Infrastructure Programs (P40 OD010440).  
10 The following mutant alleles were used in the study: *cat-2 (e1112)*, *acr-5(ok180)*, *acr-9(ok933)*,  
11 *acr-11(ok1345)*, *acr-12(ok367)*, *acr-14(ok1155)*, *acr-15(ok1214)*, *acr-16(ok789)*, *acr-18(ok1285)*,  
12 *acr-19(ok967)*, *acr-21(ok1314)*, *unc-38 (x20)*, and *unc-63(x13)*, *unc-36(e251)*, *unc-36(ad698)*,  
13 *tag-180(ok779)*. The strain PY7502, *oyIs85[ceh-36p::TU#813 + ceh-36::TU#814 + srtx-1p::GFP*  
14 *+ unc122p::DsRed]*, was used for AWC ablated animals. PY7502 was generated via expression of  
15 *recCaspases* (split caspases) <sup>41</sup> under *ceh-36* promoter <sup>82</sup>.

#### **Behavioral Assay**

**Nicotine Conditioning.** The nicotine plates were prepared freshly in 60 mm plate. When  
NGM is cooled to 55°C after sterilization, nicotine was added up to the designated  
concentration (1.5 μM). Concentrated OP50 was seeded on the nicotine plates and then one  
day later nicotine plates were used for conditioning. OP50-seeded nicotine plates were stored  
at 4°C and consumed within a week for the conditioning.

The Synchronized eggs were collected for 3 hours, and then were harvested with S  
basal-buffer [100 mM sodium chloride, 50 mM potassium phosphate (pH 6.0)] for the

conditioning when they were reached to Day1 young adult stage (16-24 hours later after mid-L4 stage). To introduce hexane as a Conditioned Stimulus (CS) to the nicotine conditioning plate, 80  $\mu$ l of agar lump (2% BBL agar) on the lid (60 mm plate) was freshly prepared before the conditioning. S basal-buffer harvested animals were placed in the middle of the conditioning plate (1.5  $\mu$ M nicotine) and then covered with a lid with an agar lump which 3  $\mu$ l of hexane was added. Since a CS was a volatile odor, the plates were sealed with parafilm during conditioning. After 4, 6, or 8 hours of conditioning (for 8hrs, 3  $\mu$ l of hexane was refilled to agar lump after 4hrs for another 4hr), worms were washed with S basal -buffer 3 times then transferred to OP50 seeded NGM without nicotine and hexane for the withdrawal session. 1 hour later, a chemotaxis assay was conducted. The withdrawal procedure (here, 1 hour) was followed after all the sessions, including [CS only] and [US only] which validated CCP, prior to performing chemotaxis to CS.

For the repeated sessions of conditioning, 1 minute of conditioning was conducted in 1ml of the S basal -buffer containing 1.5  $\mu$ M nicotine and 2  $\mu$ l of hexane with gentle rotating. After washing with S basal 3 times, conditioned worms were placed on OP50-seeded NGM for 10 minutes of withdrawal session. The above was performed repeatedly. The final withdrawal session prior to performing chemotaxis to CS was 1 hour like other CCP.

**Chemotaxis to CS** A chemotaxis assay was performed as described previously<sup>36,39,83</sup>. Briefly, 10 ml chemotaxis media [1.6% BBL-agar, 5mM potassium phosphate; pH 6.0, 1mM CaCl<sub>2</sub>, 1mM MgSO<sub>4</sub>] were prepared on the 100 mm petri dish. 1  $\mu$ l of 100mM NaN<sub>3</sub> was added to the point marked in the section of A and B (Fig. 1b). 1  $\mu$ l of CS (undiluted hexane) was added on top of the NaN<sub>3</sub> in the section of A. Immediately after the CS was absorbed into the 100 mm chemotaxis plate, about 100 washed animals were placed in the area marked

using glassware micropipette. 40 minutes later with parafilm sealing, the number of accumulated animals in each section marked (Fig. 1b) was counted to calculate the Seeking index. The index was calculated by [(number of animals in A - number of animals in B)/Total number of animals [Seeking index  $SI = (A-B)/Total(A+B+E)$ ]. Total 100-150 animals were tested in each trial to get the index.

In the case of an uncoordinated strains [*unc-38 (x20)*, and *unc-63(x13)*, *unc-36(e251)*, *unc-36(ad698)*], their CCP was confirmed again by creating an environment that could be reached to the CS (same concentration given) by moving a short distance. A square 100 mm chemotaxis plate with a grid engraved on it was prepared using the same amount of chemotaxis media. And then chemotaxis was performed in a space where animals showing uncoordinated movement using only 60 mm in the center could arrive at their destination in time. At these trials, the WT control were also performed under the same conditions.

## 1 **Statistical Analysis**

2 WT control groups were always tested together at each trial to evaluate the drug plate and the  
3 conditioning process. Each dot in the graph represents the population assay in which about 100-  
4 150 animals were tested. The mean and standard error of the mean (SEM) were determined for all  
5 experimental parameters. The data were analyzed employing the Mann-Whitney or Dunnett's tests  
6 using GraphPad Prism software (version 8.0.1). Data points with p-values below 0.05 ( $P < 0.05$ )  
7 were considered to be significant.

## 8 **Sequence alignment**

9 protein sequences were analyzed by database similarity search (<sup>84</sup>) and the multiple protein  
10 sequences were simultaneously aligned using the COBALT, a constraint based alignment tool (<sup>85</sup>).  
11 The phylogenetic tree was constructed by COBALT using minimum evolution method. The

1 sequences used for the phylogenetic tree analysis: P48182.1, Q93149.1, P54246.5, NP\_491354.2,  
2 NP\_495647.1, NP\_001361818.1, NP\_510285.2, NP\_508692.3, NP\_491906.1, AAG35183.1,  
3 NP\_495716.1, NP\_505206.2, NP\_505207.1, NP\_001023961.1, NP\_506868.2, NP\_001129756.1,  
4 NP\_001367183.1, NP\_001355515.1, NP\_504024.2, NP\_001379138.1, NP\_001380111.1,  
5 NP\_496959.1, NP\_001255705.1, NP\_509932.2, NP\_492399.1, NP\_491472.1, NP\_491533.2,  
6 G5ECT0.1, NP\_001255865.1, Q19351.5, NP\_509556.4, NP\_001023570.2

7

8

9

10

## 11 **References**

- 12 1 WorldHealthOrganization. WHO Report on the Global Tobacco Epidemic. *2017external icon*,  
13 *Geneva* (2017).
- 14 2 Koopmans, J. R., Slutske, W. S., Heath, A. C., Neale, M. C. & Boomsma, D. I. The genetics of  
15 smoking initiation and quantity smoked in Dutch adolescent and young adult twins. *Behav Genet*  
16 **29**, 383-393, doi:10.1023/a:1021618719735 (1999).
- 17 3 Stallings, M. C., Hewitt, J. K., Beresford, T., Heath, A. C. & Eaves, L. J. A twin study of drinking and  
18 smoking onset and latencies from first use to regular use. *Behav Genet* **29**, 409-421,  
19 doi:10.1023/a:1021622820644 (1999).
- 20 4 Heath, A. C., Kirk, K. M., Meyer, J. M. & Martin, N. G. Genetic and social determinants of  
21 initiation and age at onset of smoking in Australian twins. *Behav Genet* **29**, 395-407,  
22 doi:10.1023/a:1021670703806 (1999).
- 23 5 Vink, J. M., Willemsen, G. & Boomsma, D. I. Heritability of smoking initiation and nicotine  
24 dependence. *Behav Genet* **35**, 397-406, doi:10.1007/s10519-004-1327-8 (2005).
- 25 6 Hall, W. D., Gartner, C. E. & Carter, A. The genetics of nicotine addiction liability: ethical and  
26 social policy implications. *Addiction* **103**, 350-359, doi:10.1111/j.1360-0443.2007.02070.x  
27 (2008).
- 28 7 Hancock, D. B. *et al.* Genome-wide meta-analysis reveals common splice site acceptor variant in  
29 *CHRNA4* associated with nicotine dependence. *Transl Psychiatry* **5**, e651,  
30 doi:10.1038/tp.2015.149 (2015).
- 31 8 Gorwood, P., Le Strat, Y. & Ramoz, N. Genetics of addictive behavior: the example of nicotine  
32 dependence. *Dialogues Clin Neurosci* **19**, 237-245 (2017).
- 33 9 Gelernter, J. *et al.* Genome-wide association study of nicotine dependence in American  
34 populations: identification of novel risk loci in both African-Americans and European-Americans.  
35 *Biol Psychiatry* **77**, 493-503, doi:10.1016/j.biopsych.2014.08.025 (2015).



- 1 10 Gelernter, J. *et al.* Genome-wide association study of opioid dependence: multiple associations  
2 mapped to calcium and potassium pathways. *Biol Psychiatry* **76**, 66-74,  
3 doi:10.1016/j.biopsych.2013.08.034 (2014).
- 4 11 Gelernter, J. *et al.* Genome-wide association study of cocaine dependence and related traits:  
5 FAM53B identified as a risk gene. *Mol Psychiatry* **19**, 717-723, doi:10.1038/mp.2013.99 (2014).
- 6 12 Gelernter, J. *et al.* Genome-wide association study of alcohol dependence: significant findings in  
7 African- and European-Americans including novel risk loci. *Mol Psychiatry* **19**, 41-49,  
8 doi:10.1038/mp.2013.145 (2014).
- 9 13 Klein, R. J., Xu, X., Mukherjee, S., Willis, J. & Hayes, J. Successes of genome-wide association  
10 studies. *Cell* **142**, 350-351; author reply 353-355, doi:10.1016/j.cell.2010.07.026 (2010).
- 11 14 Hirschhorn, J. N. Genomewide association studies--illuminating biologic pathways. *N Engl J Med*  
12 **360**, 1699-1701, doi:10.1056/NEJMp0808934 (2009).
- 13 15 White, J. G., Southgate, E., Thomson, J. N. & Brenner, S. The structure of the nervous system of  
14 the nematode *Caenorhabditis elegans*. *Philosophical transactions of the Royal Society of London.*  
15 *Series B, Biological sciences* **314**, 1-340, doi:10.1098/rstb.1986.0056 (1986).
- 16 16 Varshney, L. R., Chen, B. L., Paniagua, E., Hall, D. H. & Chklovskii, D. B. Structural properties of  
17 the *Caenorhabditis elegans* neuronal network. *PLoS computational biology* **7**,  
18 doi:10.1371/journal.pcbi.1001066 (2011).
- 19 17 Jarrell, T. A. *et al.* The connectome of a decision-making neural network. *Science (New York,*  
20 *N.Y.)* **337**, 437-444, doi:10.1126/science.1221762 (2012).
- 21 18 Jee, C. *et al.* SEB-3, a CRF receptor-like GPCR, regulates locomotor activity states, stress  
22 responses and ethanol tolerance in *Caenorhabditis elegans*. *Genes, brain, and behavior* **12**, 250-  
23 262, doi:10.1111/j.1601-183X.2012.00829.x (2013).
- 24 19 Bierut, L. J. Genetic vulnerability and susceptibility to substance dependence. *Neuron* **69**, 618-  
25 627, doi:10.1016/j.neuron.2011.02.015 (2011).
- 26 20 Davies, A. G. *et al.* A central role of the BK potassium channel in behavioral responses to ethanol  
27 in *C. elegans*. *Cell* **115**, 655-666, doi:10.1016/S0092-8674(03)00979-6 (2003).
- 28 21 Davies, A. G., Bettinger, J. C., Thiele, T. R., Judy, M. E. & McIntire, S. L. Natural variation in the  
29 npr-1 gene modifies ethanol responses of wild strains of *C. elegans*. *Neuron* **42**, 731-743,  
30 doi:10.1016/j.neuron.2004.05.004 (2004).
- 31 22 Lee, J., Jee, C. & McIntire, S. L. Ethanol preference in *C. elegans*. *Genes, brain, and behavior* **8**,  
32 578-585, doi:10.1111/j.1601-183X.2009.00513.x (2009).
- 33 23 Feng, Z. *et al.* A *C. elegans* model of nicotine-dependent behavior: regulation by TRP-family  
34 channels. *Cell* **127**, 621-633, doi:10.1016/j.cell.2006.09.035 (2006).
- 35 24 Ward, A., Walker, V. J., Feng, Z. & Xu, X. Z. Cocaine modulates locomotion behavior in *C. elegans*.  
36 *PloS one* **4**, doi:10.1371/journal.pone.0005946 (2009).
- 37 25 Carvelli, L., Matthies, D. S. & Galli, A. Molecular mechanisms of amphetamine actions in  
38 *Caenorhabditis elegans*. *Molecular pharmacology* **78**, 151-156, doi:10.1124/mol.109.062703  
39 (2010).
- 40 26 Waggoner, L. E. *et al.* Long-term nicotine adaptation in *Caenorhabditis elegans* involves PKC-  
41 dependent changes in nicotinic receptor abundance. *The Journal of neuroscience : the official*  
42 *journal of the Society for Neuroscience* **20**, 8802-8811 (2000).
- 43 27 Rauthan, M. *et al.* MicroRNA Regulation of nAChR Expression and Nicotine-Dependent Behavior  
44 in *C. elegans*. *Cell Reports* **21**, 1434-1441, doi:10.1016/j.celrep.2017.10.043 (2017).
- 45 28 Fudala, P. J., Teoh, K. W. & Iwamoto, E. T. Pharmacologic characterization of nicotine-induced  
46 conditioned place preference. *Pharmacol Biochem Behav* **22**, 237-241, doi:10.1016/0091-  
47 3057(85)90384-3 (1985).

- 1 29 Spyraiki, C., Fibiger, H. C. & Phillips, A. G. Dopaminergic substrates of amphetamine-induced  
2 place preference conditioning. *Brain Res* **253**, 185-193, doi:10.1016/0006-8993(82)90685-0  
3 (1982).
- 4 30 Kruszewska, A., Romandini, S. & Samanin, R. Different effects of zimeidine on the reinforcing  
5 properties of d-amphetamine and morphine on conditioned place preference in rats. *Eur J*  
6 *Pharmacol* **125**, 283-286, doi:10.1016/0014-2999(86)90038-5 (1986).
- 7 31 Sellings, L. *et al.* Nicotine-motivated behavior in *Caenorhabditis elegans* requires the nicotinic  
8 acetylcholine receptor subunits *acr-5* and *acr-15*. *The European journal of neuroscience* **37**, 743-  
9 756, doi:10.1111/ejn.12099 (2013).
- 10 32 Di Chiara, G. Role of dopamine in the behavioural actions of nicotine related to addiction. *Eur J*  
11 *Pharmacol* **393**, 295-314, doi:10.1016/s0014-2999(00)00122-9 (2000).
- 12 33 Ikemoto, S., Qin, M. & Liu, Z. H. Primary reinforcing effects of nicotine are triggered from  
13 multiple regions both inside and outside the ventral tegmental area. *J Neurosci* **26**, 723-730,  
14 doi:10.1523/jneurosci.4542-05.2006 (2006).
- 15 34 Wes, P. D. & Bargmann, C. I. *C. elegans* odour discrimination requires asymmetric diversity in  
16 olfactory neurons. *Nature* **410**, 698-701, doi:10.1038/35070581 (2001).
- 17 35 Hukema, R. K., Rademakers, S. & Jansen, G. Gustatory plasticity in *C. elegans* involves integration  
18 of negative cues and NaCl taste mediated by serotonin, dopamine, and glutamate. *Learning &*  
19 *memory (Cold Spring Harbor, N.Y.)* **15**, 829-836, doi:10.1101/lm.994408 (2008).
- 20 36 Bargmann, C. I., Hartwig, E. & Horvitz, H. R. Odorant-selective genes and neurons mediate  
21 olfaction in *C. elegans*. *Cell* **74**, 515-527, doi:10.1016/0092-8674(93)80053-h (1993).
- 22 37 Hilliard, M. A., Bergamasco, C., Arbucci, S., Plasterk, R. H. & Bazzicalupo, P. Worms taste bitter:  
23 ASH neurons, QUI-1, GPA-3 and ODR-3 mediate quinine avoidance in *Caenorhabditis elegans*.  
24 *The EMBO journal* **23**, 1101-1111, doi:10.1038/sj.emboj.7600107 (2004).
- 25 38 Sengupta, P., Colbert, H. A. & Bargmann, C. I. The *C. elegans* gene *odr-7* encodes an olfactory-  
26 specific member of the nuclear receptor superfamily. *Cell* **79**, 971-980, doi:10.1016/0092-  
27 8674(94)90028-0 (1994).
- 28 39 Bargmann, C. I. & Horvitz, H. R. Chemosensory neurons with overlapping functions direct  
29 chemotaxis to multiple chemicals in *C. elegans*. *Neuron* **7**, 729-742, doi:10.1016/0896-  
30 6273(91)90276-6 (1991).
- 31 40 Larsch, J. *et al.* A Circuit for Gradient Climbing in *C. elegans* Chemotaxis. *Cell reports* **12**, 1748-  
32 1760, doi:10.1016/j.celrep.2015.08.032 (2015).
- 33 41 Chelur, D. S. & Chalfie, M. Targeted cell killing by reconstituted caspases. *Proceedings of the*  
34 *National Academy of Sciences of the United States of America* **104**, 2283-2288,  
35 doi:10.1073/pnas.0610877104 (2007).
- 36 42 Beverly, M., Anbil, S. & Sengupta, P. Degeneracy and neuromodulation among thermosensory  
37 neurons contribute to robust thermosensory behaviors in *Caenorhabditis elegans*. *The Journal of*  
38 *neuroscience : the official journal of the Society for Neuroscience* **31**, 11718-11727,  
39 doi:10.1523/JNEUROSCI.1098-11.2011 (2011).
- 40 43 Polli, J. R. *et al.* Drug-dependent behaviors and nicotinic acetylcholine receptor expressions in  
41 *Caenorhabditis elegans* following chronic nicotine exposure. *NeuroToxicology* **47**, 27-36,  
42 doi:10.1016/j.neuro.2014.12.005 (2015).
- 43 44 Brejc, K. *et al.* Crystal structure of an ACh-binding protein reveals the ligand-binding domain of  
44 nicotinic receptors. *Nature* **411**, 269-276, doi:10.1038/35077011 (2001).
- 45 45 Sharma, G. & Vijayaraghavan, S. Nicotinic receptors containing the alpha7 subunit: a model for  
46 rational drug design. *Curr Med Chem* **15**, 2921-2932, doi:10.2174/092986708786848703 (2008).

- 1 46 Hammarlund, M., Hobert, O., Miller, D. M., 3rd & Sestan, N. The CeNGEN Project: The Complete  
2 Gene Expression Map of an Entire Nervous System. *Neuron* **99**, 430-433,  
3 doi:10.1016/j.neuron.2018.07.042 (2018).
- 4 47 Liu, P., Chen, B. & Wang, Z. W. GABAergic motor neurons bias locomotor decision-making in *C.*  
5 *elegans*. *Nat Commun* **11**, 5076, doi:10.1038/s41467-020-18893-9 (2020).
- 6 48 Macosko, E. Z. *et al.* A hub-and-spoke circuit drives pheromone attraction and social behaviour  
7 in *C. elegans*. *Nature* **458**, 1171-1175, doi:10.1038/nature07886 (2009).
- 8 49 Fleming, J. T. *et al.* *Caenorhabditis elegans* levamisole resistance genes *lev-1*, *unc-29*, and *unc-38*  
9 encode functional nicotinic acetylcholine receptor subunits. *J Neurosci* **17**, 5843-5857,  
10 doi:10.1523/jneurosci.17-15-05843.1997 (1997).
- 11 50 Culetto, E. *et al.* The *Caenorhabditis elegans* *unc-63* gene encodes a levamisole-sensitive  
12 nicotinic acetylcholine receptor alpha subunit. *J Biol Chem* **279**, 42476-42483,  
13 doi:10.1074/jbc.M404370200 (2004).
- 14 51 Adkins, A. E. *et al.* Genomewide Association Study of Alcohol Dependence Identifies Risk Loci  
15 Altering Ethanol-Response Behaviors in Model Organisms. *Alcohol Clin Exp Res* **41**, 911-928,  
16 doi:10.1111/acer.13362 (2017).
- 17 52 Campusano, J. M., Su, H., Jiang, S. A., Sicaeros, B. & O'Dowd, D. K. nAChR-mediated calcium  
18 responses and plasticity in *Drosophila* Kenyon cells. *Dev Neurobiol* **67**, 1520-1532,  
19 doi:10.1002/dneu.20527 (2007).
- 20 53 Vijayaraghavan, S., Pugh, P. C., Zhang, Z. W., Rathouz, M. M. & Berg, D. K. Nicotinic receptors  
21 that bind alpha-bungarotoxin on neurons raise intracellular free Ca<sup>2+</sup>. *Neuron* **8**, 353-362,  
22 doi:10.1016/0896-6273(92)90301-s (1992).
- 23 54 Sharma, G., Grybko, M. & Vijayaraghavan, S. Action potential-independent and nicotinic  
24 receptor-mediated concerted release of multiple quanta at hippocampal CA3-mossy fiber  
25 synapses. *J Neurosci* **28**, 2563-2575, doi:10.1523/jneurosci.5407-07.2008 (2008).
- 26 55 Albuquerque, E. X. *et al.* Properties of neuronal nicotinic acetylcholine receptors:  
27 pharmacological characterization and modulation of synaptic function. *J Pharmacol Exp Ther*  
28 **280**, 1117-1136 (1997).
- 29 56 Changeux, J. P. Nicotine addiction and nicotinic receptors: lessons from genetically modified  
30 mice. *Nat Rev Neurosci* **11**, 389-401, doi:10.1038/nrn2849 (2010).
- 31 57 Dajas-Bailador, F. A., Mogg, A. J. & Wonnacott, S. Intracellular Ca<sup>2+</sup> signals evoked by  
32 stimulation of nicotinic acetylcholine receptors in SH-SY5Y cells: contribution of voltage-  
33 operated Ca<sup>2+</sup> channels and Ca<sup>2+</sup> stores. *J Neurochem* **81**, 606-614, doi:10.1046/j.1471-  
34 4159.2002.00846.x (2002).
- 35 58 Dajas-Bailador, F. & Wonnacott, S. Nicotinic acetylcholine receptors and the regulation of  
36 neuronal signalling. *Trends Pharmacol Sci* **25**, 317-324, doi:10.1016/j.tips.2004.04.006 (2004).
- 37 59 Yin, X. *et al.* Genome-wide meta-analysis identifies a novel susceptibility signal at CACNA2D3 for  
38 nicotine dependence. *Am J Med Genet B Neuropsychiatr Genet* **174**, 557-567,  
39 doi:10.1002/ajmg.b.32540 (2017).
- 40 60 Uhl, G. R. *et al.* Molecular genetics of successful smoking cessation: convergent genome-wide  
41 association study results. *Arch Gen Psychiatry* **65**, 683-693, doi:10.1001/archpsyc.65.6.683  
42 (2008).
- 43 61 Davies, A. *et al.* Functional biology of the alpha(2)delta subunits of voltage-gated calcium  
44 channels. *Trends Pharmacol Sci* **28**, 220-228, doi:10.1016/j.tips.2007.03.005 (2007).
- 45 62 Lainé, V., Frøkjær-Jensen, C., Couchoux, H. & Jospin, M. The alpha1 subunit EGL-19, the  
46 alpha2/delta subunit UNC-36, and the beta subunit CCB-1 underlie voltage-dependent calcium  
47 currents in *Caenorhabditis elegans* striated muscle. *J Biol Chem* **286**, 36180-36187,  
48 doi:10.1074/jbc.M111.256149 (2011).

- 1 63 Liu, M. *et al.* Association studies of up to 1.2 million individuals yield new insights into the  
2 genetic etiology of tobacco and alcohol use. *Nat Genet* **51**, 237-244, doi:10.1038/s41588-018-  
3 0307-5 (2019).
- 4 64 Xu, Y. *et al.* Prediction of Smoking Behavior From Single Nucleotide Polymorphisms With  
5 Machine Learning Approaches. *Front Psychiatry* **11**, 416, doi:10.3389/fpsy.2020.00416 (2020).
- 6 65 Lai, C. H., Chou, C. Y., Ch'ang, L. Y., Liu, C. S. & Lin, W. Identification of novel human genes  
7 evolutionarily conserved in *Caenorhabditis elegans* by comparative proteomics. *Genome Res* **10**,  
8 703-713, doi:10.1101/gr.10.5.703 (2000).
- 9 66 Kim, W., Underwood, R. S., Greenwald, I. & Shaye, D. D. OrthoList 2: A New Comparative  
10 Genomic Analysis of Human and *Caenorhabditis elegans* Genes. *Genetics* **210**, 445-461,  
11 doi:10.1534/genetics.118.301307 (2018).
- 12 67 Liedtke, W., Tobin, D. M., Bargmann, C. I. & Friedman, J. M. Mammalian TRPV4 (VR-OAC) directs  
13 behavioral responses to osmotic and mechanical stimuli in *Caenorhabditis elegans*. *Proc Natl*  
14 *Acad Sci U S A* **100 Suppl 2**, 14531-14536, doi:10.1073/pnas.2235619100 (2003).
- 15 68 Young, A. T. *et al.* Modelling brain dopamine-serotonin vesicular transport disease in  
16 *Caenorhabditis elegans*. *Dis Model Mech* **11**, doi:10.1242/dmm.035709 (2018).
- 17 69 Wang, D. *et al.* Genetic behavioral screen identifies an orphan anti-opioid system. *Science* **365**,  
18 1267-1273, doi:10.1126/science.aau2078 (2019).
- 19 70 Katsura, M. *et al.* Up-regulation of L-type voltage-dependent calcium channels after long term  
20 exposure to nicotine in cerebral cortical neurons. *J Biol Chem* **277**, 7979-7988,  
21 doi:10.1074/jbc.M109466200 (2002).
- 22 71 Michalak, A. & Biala, G. Calcium homeostasis and protein kinase/phosphatase balance  
23 participate in nicotine-induced memory improvement in passive avoidance task in mice. *Behav*  
24 *Brain Res* **317**, 27-36, doi:10.1016/j.bbr.2016.09.023 (2017).
- 25 72 Risher, W. C. & Eroglu, C. Emerging roles for  $\alpha 2\delta$  subunits in calcium channel function and  
26 synaptic connectivity. *Curr Opin Neurobiol* **63**, 162-169, doi:10.1016/j.conb.2020.04.007 (2020).
- 27 73 Tong, X. J. *et al.* Retrograde Synaptic Inhibition Is Mediated by  $\alpha$ -Neurexin Binding to the  $\alpha 2\delta$   
28 Subunits of N-Type Calcium Channels. *Neuron* **95**, 326-340.e325,  
29 doi:10.1016/j.neuron.2017.06.018 (2017).
- 30 74 Chen, J. *et al.* The  $\alpha 2\delta$ -1-NMDA Receptor Complex Is Critically Involved in Neuropathic Pain  
31 Development and Gabapentin Therapeutic Actions. *Cell Rep* **22**, 2307-2321,  
32 doi:10.1016/j.celrep.2018.02.021 (2018).
- 33 75 Zhang, F. X., Gadotti, V. M., Souza, I. A., Chen, L. & Zamponi, G. W. BK Potassium Channels  
34 Suppress Cav $\alpha 2\delta$  Subunit Function to Reduce Inflammatory and Neuropathic Pain. *Cell Rep* **22**,  
35 1956-1964, doi:10.1016/j.celrep.2018.01.073 (2018).
- 36 76 Kadurin, I., Rothwell, S. W., Lana, B., Nieto-Rostro, M. & Dolphin, A. C. LRP1 influences trafficking  
37 of N-type calcium channels via interaction with the auxiliary  $\alpha(2)\delta$ -1 subunit. *Scientific reports* **7**,  
38 43802-43802, doi:10.1038/srep43802 (2017).
- 39 77 Deng, M., Chen, S. R., Chen, H. & Pan, H. L.  $\alpha 2\delta$ -1-Bound N-Methyl-D-aspartate Receptors  
40 Mediate Morphine-induced Hyperalgesia and Analgesic Tolerance by Potentiating Glutamatergic  
41 Input in Rodents. *Anesthesiology* **130**, 804-819, doi:10.1097/aln.0000000000002648 (2019).
- 42 78 Risher, M. L. *et al.* Adolescent Intermittent Alcohol Exposure: Dysregulation of  
43 Thrombospondins and Synapse Formation are Associated with Decreased Neuronal Density in  
44 the Adult Hippocampus. *Alcohol Clin Exp Res* **39**, 2403-2413, doi:10.1111/acer.12913 (2015).
- 45 79 Caylor, R. C., Jin, Y. & Ackley, B. D. The *Caenorhabditis elegans* voltage-gated calcium channel  
46 subunits UNC-2 and UNC-36 and the calcium-dependent kinase UNC-43/CaMKII regulate  
47 neuromuscular junction morphology. *Neural Dev* **8**, 10, doi:10.1186/1749-8104-8-10 (2013).

1 80 Davies, A. *et al.* The calcium channel alpha2delta-2 subunit partitions with CaV2.1 into lipid rafts  
2 in cerebellum: implications for localization and function. *J Neurosci* **26**, 8748-8757,  
3 doi:10.1523/jneurosci.2764-06.2006 (2006).  
4 81 Brenner, S. The genetics of *Caenorhabditis elegans*. *Genetics* **77**, 71-94 (1974).  
5 82 Kim, K., Kim, R. & Sengupta, P. The HMX/NKX homeodomain protein MLS-2 specifies the identity  
6 of the AWC sensory neuron type via regulation of the *ceh-36* Otx gene in *C. elegans*.  
7 *Development (Cambridge, England)* **137**, 963-974, doi:10.1242/dev.044719 (2010).  
8 83 Colbert, H. A. & Bargmann, C. I. Odorant-specific adaptation pathways generate olfactory  
9 plasticity in *C. elegans*. *Neuron* **14**, 803-812, doi:10.1016/0896-6273(95)90224-4 (1995).  
10 84 Gish, W. & States, D. J. Identification of protein coding regions by database similarity search. *Nat*  
11 *Genet* **3**, 266-272, doi:10.1038/ng0393-266 (1993).  
12 85 Papadopoulos, J. S. & Agarwala, R. COBALT: constraint-based alignment tool for multiple protein  
13 sequences. *Bioinformatics* **23**, 1073-1079, doi:10.1093/bioinformatics/btm076 (2007).  
14  
15

## 1 **Acknowledgments**

2 This work was supported by College of Medicine, University of Tennessee Health Science  
3 Center (UTHSC) and a pilot project in support of P50DA037844, University of California San  
4 Diego. We thank the *C. elegans* Genetics Center (CGC) for providing strains, which is funded by  
5 NIH Office of Research Infrastructure Programs (P40 OD010440). We also thank the CeNGEN(a  
6 single-cell gene expression profile of every neuron type in the *C. elegans*: Funded by NIH-NINDS,  
7 grant R01NS100547) for providing gene expression profile.

8 Authors declare no conflict of interests.

9

10

## 11 **Figure Legends**

### 12 **Fig.1 Nicotine Conditioned Cue Preference (CCP) using hexane as conditioned stimulus (CS).**

13 (a) Identification of hexane, as a neutral odor substance to naïve animals. One-way ANOVA of  
14 chemotaxis in wild-type animals to various concentrations of hexane did not show significant  
15 differences ( $p=0.6136$ ,  $F(2, 32)=0.02649$ ). (b) The diagram of nicotine Conditioned Cue  
16 Preference (CCP) using hexane as Conditioned Stimulus. 1-day adult Wild-type worms were pre-  
17 incubated with 1.5  $\mu\text{M}$  nicotine and 2 $\mu\text{l}$  of non-diluted hexane for conditioning. The conditioned  
18 worms were transferred to OP50-Bacteria seeded plate then 1 hour later withdrawn worms from  
19 nicotine were moved to the chemotaxis assay plate. (c) Wild-type *C. elegans* develops CCP after  
20 chronic conditioning and following withdrawal from nicotine. (d) The CCP development by  
21 nicotine conditioning was validated by pretreatment of US only or CS only. US only; 4hr treatment  
22 of nicotine alone (1.5  $\mu\text{M}$ ), CS only; 4hr treatment of hexane alone, Conditioned (US + CS); 4hr  
23 conditioning of nicotine (1.5  $\mu\text{M}$ ) and hexane, all of those were withdrawn for 1 hour before  
24 chemotaxis to hexane. Each dot represents trial of population assay. (\*\*\*\*, One-way ANOVA,  
25  $F(4, 36)=1.683$ ).

26

27

1  
2  
3  
4  
5  
6  
7  
8  
9  
10  
11  
12  
13  
14  
15  
16  
17  
18  
19  
20  
21  
22  
23  
24  
25

**Fig.2 Dopamine is required to develop CCP.** A *cat-2* encodes a tyrosine hydroxylase, which catalyzes the conversion of tyrosine to L-DOPA, the biosynthetic precursor of dopamine. Conditioned (US + CS); 4hr conditioning of nicotine (1.5  $\mu$ M) and hexane, animals were withdrawn for 1 hour before chemotaxis to hexane. Each dot represents trial of population assay.  $P=0.7527$ (Mann-Whitney test).

**Fig. 3. Characteristics of CCP.** (a) Wild-Type *C. elegans* learns extinction of CCP. Each dot represents trial of population assay. \*\*,  $P<0.01$ ; \*\*\*,  $P<0.001$  (Mann-Whitney test). (b) Nicotine Conditioned Cue Preference (CCP) of AWC neuron ablated animals. Single session of 4 hours CCP on 1.5  $\mu$ M nicotine plates. Single session of 4 hours CCP on 1.5  $\mu$ M nicotine plates

**Fig. 4. CCP is specifically elicited by nicotine.** The short time of repeated conditioning (1min, without food during conditioning) and withdrawal elicits successful CCP. A conditioning session (nicotine and hexane) was 1minute and 10minutes of withdrawal was followed. After multiple session of conditioning, the last withdrawal session was consistent as 60minutes before conducting chemotaxis to CS. Each dot represents trial of population assay. \*,  $P<0.05$ ; \*\*\*,  $P<0.001$  (Mann-Whitney test).

1 **Fig. 5. Identification of nAChRs relevant to CCP progression.** (a) Phylogenetic analysis  
2 showing the nAChR receptor family of *C. elegans*. Using protein sequence homology, nAChR  
3 subunits were classified. (b) WT#1; one-way ANOVA with a post-hoc Dunnett's test.  $F(2,$   
4  $18)=62.13$ ,  $P<0.001$  (c) *acr-5 (ok180)*, ( $P=0.002$ , One-way ANOVA,  $F(2, 23)=8.396$ , \*\*  
5 represents  $P<0.01$  from post hoc multiple comparison test; Dunnett's). \*\* represents  $P<0.01$  from  
6 post hoc multiple comparison test; Dunnett's. (d) *acr-9 (ok933)*, (not significant, One-way  
7 ANOVA,  $F(2, 33)=2.755$ , ns from post hoc multiple comparison test; Dunnett's). (e) *acr-*  
8 *11(ok1345)*, (not significant, One-way ANOVA,  $F(2, 21)=1.423$ , ns from post hoc multiple  
9 comparison test; Dunnett's). (f) *acr-12(ok367)*, ( $p=0.003$ , One-way ANOVA,  $F(2, 27)=7.029$ , \*\*  
10 represents  $P<0.01$  from post hoc multiple comparison test; Dunnett's). (g) *acr-14(ok1155)*,  
11 ( $p=0.001$ , One-way ANOVA,  $F(2, 21)=9.189$ , \*\* represents  $P<0.01$  from post hoc multiple  
12 comparison test; Dunnett's). (h) WT #2, ( $p<0.001$ , One-way ANOVA,  $F(2, 18)=11.17$ , \*\*  
13 represents  $P<0.01$  from post hoc multiple comparison test; Dunnett's). (i) *acr-15 (ok1214)*, (not  
14 significant, One-way ANOVA,  $F(2, 21)=1.735$ , ns from post hoc multiple comparison test;  
15 Dunnett's). (j) *acr-16 (ok789)*, (not significant, One-way ANOVA,  $F(2, 31)=0.9130$ , ns from post  
16 hoc multiple comparison test; Dunnett's). (k) *acr-18(ok1285)*, ( $P=0.01$ , One-way ANOVA,  $F(2,$   
17  $15)=6.177$ , \*\* represents  $P<0.01$  from post hoc multiple comparison test; Dunnett's). (l) *acr-*  
18 *19(ok967)*, ( $P=0.03$ , One-way ANOVA,  $F(2, 18)=4.080$ , \* represents  $P<0.05$  from post hoc  
19 multiple comparison test; Dunnett's). (m) *acr-21(ok1314)*, (not significant, One-way ANOVA,  
20  $F(2, 21)=0.09735$ , ns from post hoc multiple comparison test; Dunnett's). (n) WT#3, ( $p<0.001$ ,  
21 One-way ANOVA,  $F(2, 18)=40.66$ , \*\*\* represents  $P<0.001$  from post hoc multiple comparison  
22 test; Dunnett's). (o) *unc-38(x20)*, (not significant, One-way ANOVA,  $F(2, 22)=0.08521$ , ns from  
23 post hoc multiple comparison test; Dunnett's). (p) *unc-63(x13)*, (not significant, One-way  
24 ANOVA,  $F(2, 15)=0.5035$ , ns from post hoc multiple comparison test; Dunnett's).

25

26

27 **Fig. 6.** The orthogonal test evaluated nicotine preference of  $\alpha 2\delta$  proteins (a) Wild-type CCP was  
28 conducted at each trial to evaluate the drug plate and the conditioning process (\*\*\*, One-way  
29 ANOVA,  $F(3, 32)=27.17$ , \*\*\* represents  $P<0.001$  from post hoc multiple comparison test;  
30 Dunnett's). (b) *unc-36 (e251)*, orthologue of *CACNA2D3*, showed delayed and reduced



1 development of CCP (\*\*\*, One-way ANOVA,  $F(3, 47)=7.694$ , \* represents  $p<0.05$  and \*\*  $P<0.05$   
2 from post hoc multiple comparison test; Dunnett's). (c) Impaired CCP was observed in *unc-36*  
3 (*ad698*), orthologue of *CACNA2D3*, (\*, One-way ANOVA,  $F(3, 16)=3.475$ , \* represents  $p<0.05$   
4 and \*\*  $P<0.05$  from post hoc multiple comparison test; Dunnett's). (d) Impaired CCP in *tag-180*  
5 (*ok779*), orthologue of *CACNA2D2*. (\*, One-way ANOVA,  $F(3, 47)=2.885$ , \* represents  $p<0.05$   
6 from post hoc multiple comparison test; Dunnett's). (e) Orthogonal test in repeated CCP. Repeated  
7 training of conditioning and intermittent withdrawal further demonstrated reduced development of  
8 nicotine preference in the mutant animals of  $\alpha 2\delta$  orthologues. (\*\*\*, One-way ANOVA,  $F(3,$   
9  $31)=8.112$ , \*\* represents  $p<0.01$  and \*\*\*  $P<0.001$  from post hoc multiple comparison test;  
10 Dunnett's). Each dot represents a trial of population assay.

11

12

1 **Fig. 1.**

2

3

a

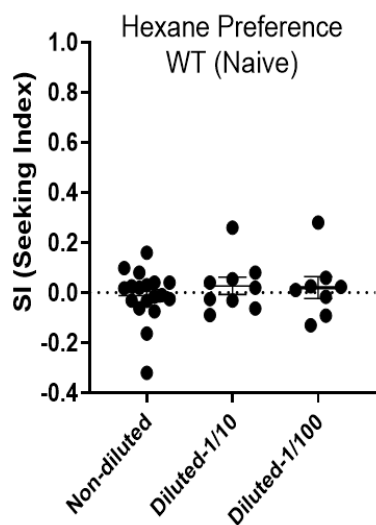

4

5

b

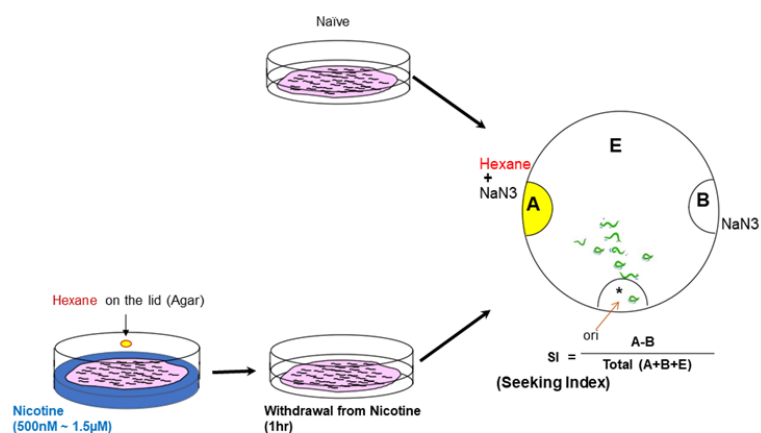

c

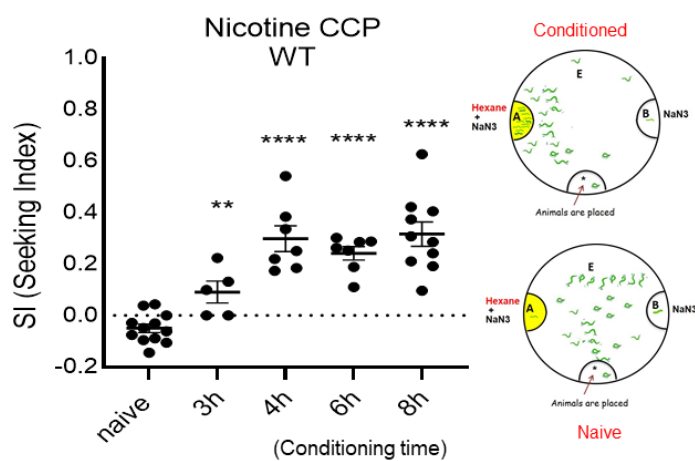

6

7

8

d

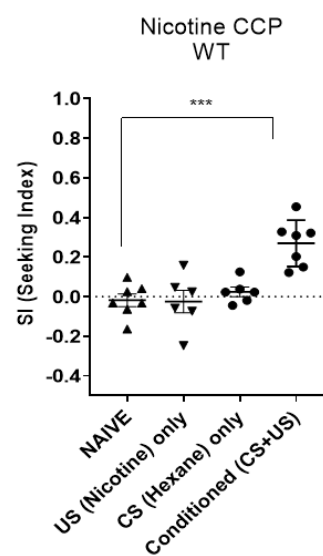



1  
2  
3  
4

**Fig. 3**

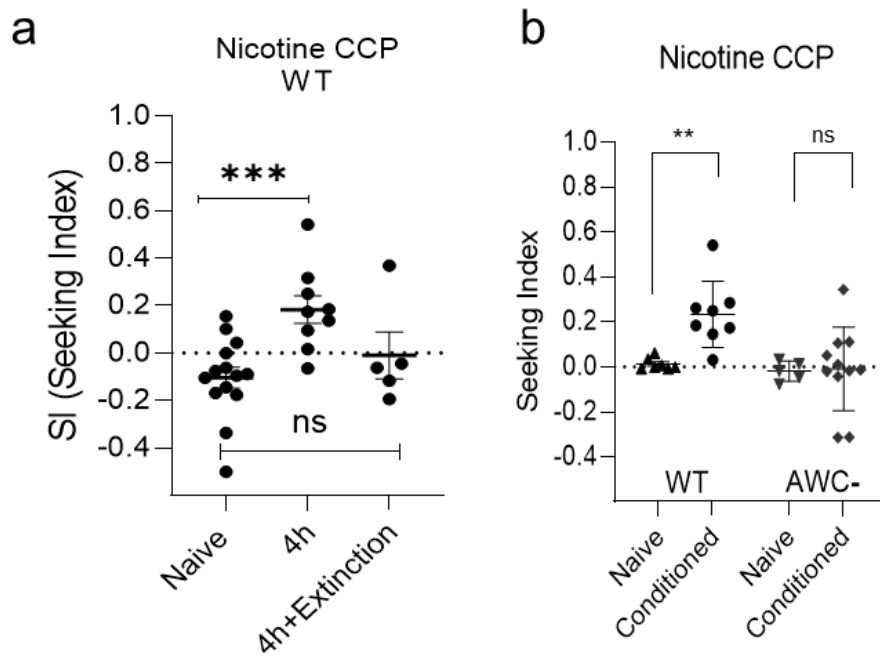

5  
6  
7  
8  
9  
10  
11  
12  
13  
14

1  
2  
3  
4  
5  
6  
7  
8  
9  
10  
11  
12  
13  
14  
15  
16  
17

**Fig. 4**

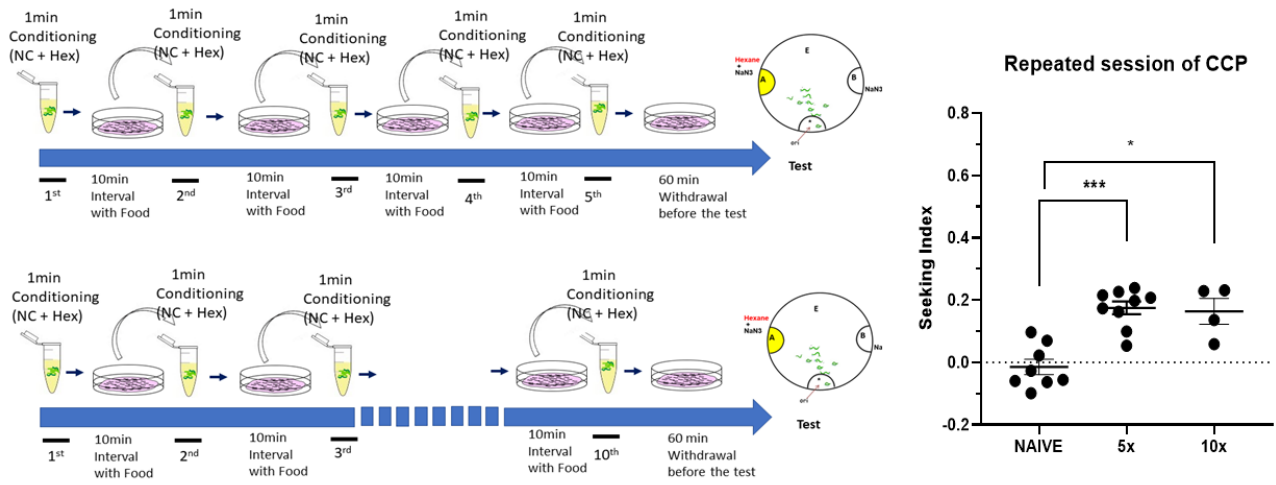

1 **Fig. 5**

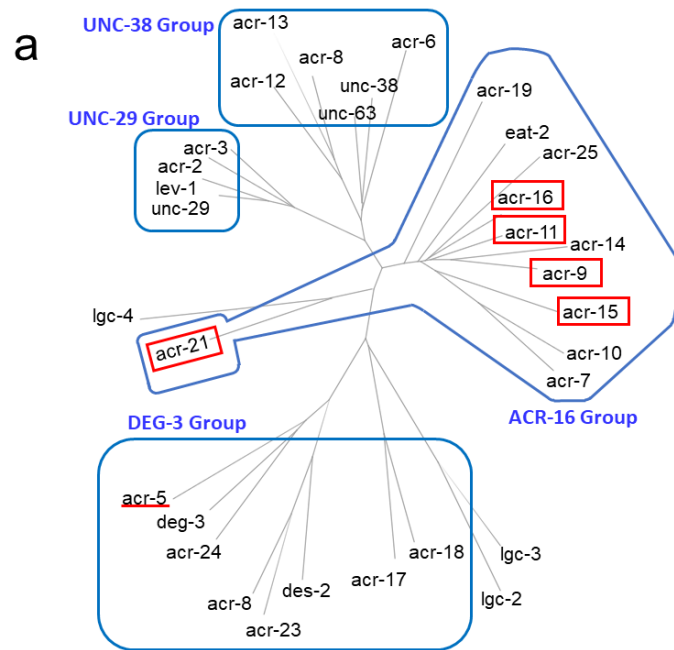

2

3

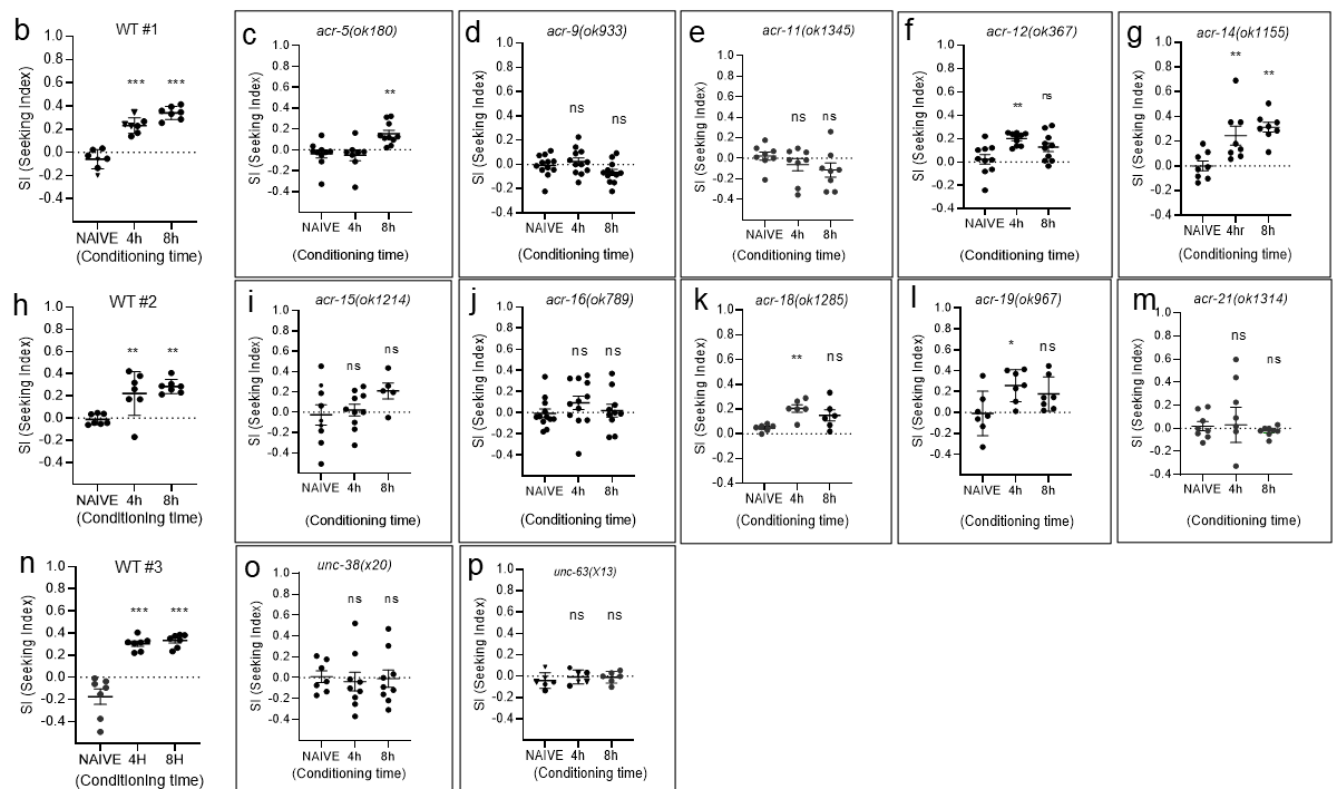

4

1  
2  
3  
4  
5

**Fig. 6**

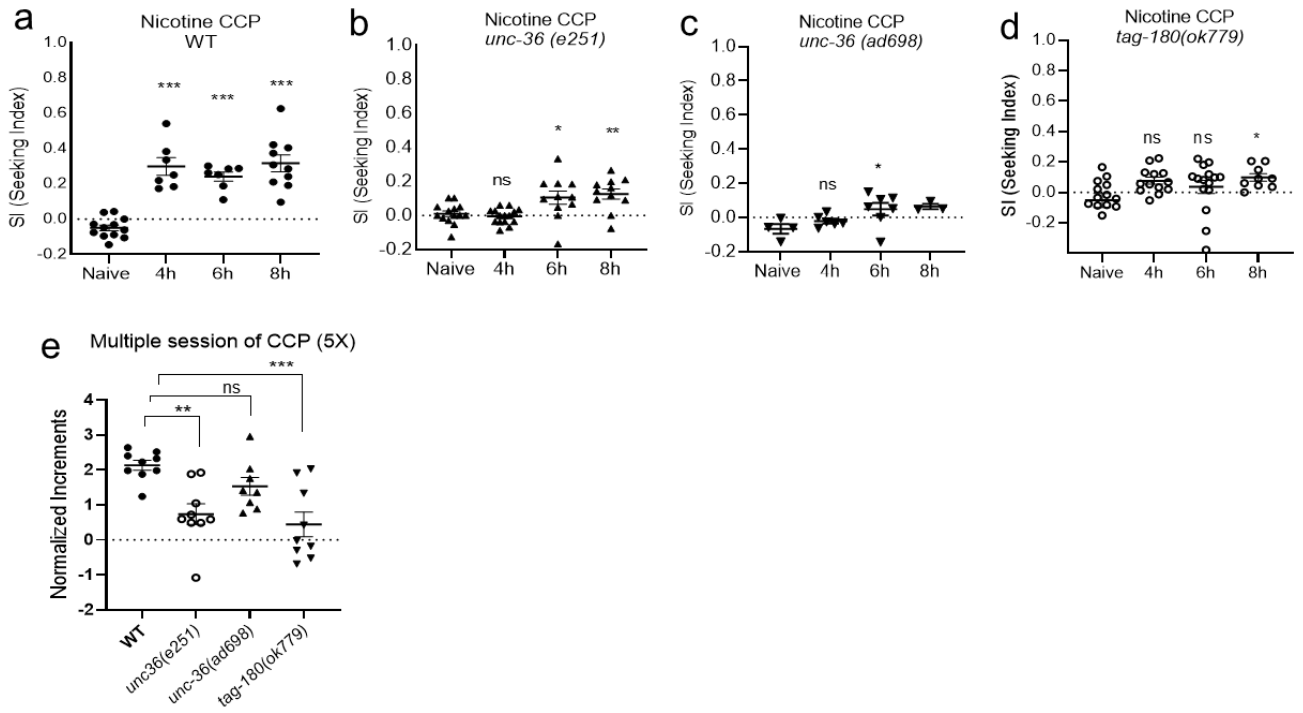

6  
7  
8  
9  
10  
11  
12  
13
